# Supplementary material for: A New Approach to Synthesize of 4-Phenacylideneflavene Derivatives and to Evaluate Their Cytotoxic Effects on HepG2 Cell Line
Source: MDPI journal article supplement (doi:10.3390/molecules22081296), 2017-08-09
Supplement: s1 [file s1]

Supplementary materials for

**A new approach to synthesis of 4-phenacylidene-flavene derivatives and  
their potential cytotoxic effects on HepG2 cell line**

Hongbin Chen<sup>1</sup>, Yang Xu<sup>2</sup>, Yi-Nan Zhang<sup>3</sup>, Zong-Ping Zheng<sup>1,\*</sup>

<sup>1</sup>Fujian Province Key Laboratory for the Development of Bioactive material from marine alge, College of Oceanology and Food Science, Quanzhou Normal University, Quanzhou 362000, Fujian Province, Republic of China

<sup>2</sup>School of Pharmaceutical Sciences, Xiamen University, Xiamen, Fujian, People's Republic of China

<sup>3</sup>College of pharmacy, University of Kentucky, Lexington, Kentucky 40536, United States

\*Corresponding author. Tel./Fax: +86 595 22919563.

E-mail address: zzpsea@qztc.edu.cn (Z.P. Zheng).

**Figure S1.** ESI-MS of 2-(7-hydroxy-2-phenyl-chromen-4-ylidene)-1-phenyl-ethanone (**4a**)

**Figure S2.**  $^1\text{H}$  NMR of 2-(7-hydroxy-2-phenyl-chromen-4-ylidene)-1-phenyl-ethanone (**4a**)

**Figure S3.**  $^{13}\text{C}$  NMR of 2-(7-hydroxy-2-phenyl-chromen-4-ylidene)-1-phenyl-ethanone (**4a**)

**Figure S4.** ESI-MS of 2-[7-hydroxy-2-(2-hydroxy-phenyl)-chromen-4-ylidene]-1-(2-hydroxy-phenyl)-ethanone (**4b**)

**Figure S5.**  $^1\text{H}$  NMR of 2-[7-hydroxy-2-(2-hydroxy-phenyl)-chromen-4-ylidene]-1-(2-hydroxy-phenyl)-ethanone (**4b**)

**Figure S5.**  $^{13}\text{C}$  NMR of 2-[7-hydroxy-2-(2-hydroxy-phenyl)-chromen-4-ylidene]-1-(2-hydroxy-phenyl)-ethanone (**4b**)

**Figure S6.**  $^1\text{H}$ - $^1\text{H}$  COSY of 2-[7-hydroxy-2-(2-hydroxy-phenyl)-chromen-4-ylidene]-1-(2-hydroxy-phenyl)-ethanone (**4b**)

**Figure S7.** HSQC of 2-[7-hydroxy-2-(2-hydroxy-phenyl)-chromen-4-ylidene]-1-(2-hydroxy-phenyl)-ethanone (**4b**)

**Figure S8.** HMBC of 2-[7-hydroxy-2-(2-hydroxy-phenyl)-chromen-4-ylidene]-1-(2-hydroxy-phenyl)-ethanone (**4b**)

**Figure S9.** ESI-MS of 2-[7-hydroxy-2-(3-hydroxy-phenyl)-chromen-4-ylidene]-1-(3-hydroxy-phenyl)-ethanone (**4c**)

**Figure S10.**  $^1\text{H}$  NMR of 2-[7-hydroxy-2-(3-hydroxy-phenyl)-chromen-4-ylidene]-1-(3-hydroxy-phenyl)-ethanone (**4c**)

**Figure S11.**  $^{13}\text{C}$  NMR of 2-[7-hydroxy-2-(3-hydroxy-phenyl)-chromen-4-ylidene]-1-(3-hydroxy-phenyl)-ethanone (**4c**)

**Figure S12.** HSQC of 2-[7-hydroxy-2-(3-hydroxy-phenyl)-chromen-4-ylidene]-1-(3-hydroxy-phenyl)-ethanone (**4c**)

**Figure S13.** HMBC of 2-[7-hydroxy-2-(3-hydroxy-phenyl)-chromen-4-ylidene]-1-(3-hydroxy-phenyl)-ethanone (**4c**)

**Figure S14.** ESI-MS of 2-[7-hydroxy-2-(4-hydroxy-phenyl)-chromen-4-ylidene]-1-(4-hydroxy-phenyl)-ethanone (**4d**)

**Figure S15.**  $^1\text{H}$  NMR of 2-[7-hydroxy-2-(4-hydroxy-phenyl)-chromen-4-ylidene]-1-(4-hydroxy-phenyl)-ethanone (**4d**)

**Figure S16.**  $^{13}\text{C}$  NMR of 2-[7-hydroxy-2-(4-hydroxy-phenyl)-chromen-4-ylidene]-1-(4-hydroxy-phenyl)-ethanone (**4d**)

**Figure S17.**  $^1\text{H}$ - $^1\text{H}$  COSY of 2-[7-hydroxy-2-(4-hydroxy-phenyl)-chromen-4-ylidene]-1-(4-hydroxy-phenyl)-ethanone (**4d**)

**Figure S18.** HSQC of 2-[7-hydroxy-2-(4-hydroxy-phenyl)-chromen-4-ylidene]-1-(4-hydroxy-phenyl)-ethanone (**4d**)

**Figure S19.** HMBC of 2-[7-hydroxy-2-(4-hydroxy-phenyl)-chromen-4-ylidene]-1-(4-hydroxy-phenyl)-ethanone (**4d**)

**Figure S20.** ESI-MS of 2-(7-Hydroxy-2-p-tolyl-chromen-4-ylidene)-1-p-tolyl-ethanone (**4e**)

**Figure S21.**  $^1\text{H}$  NMR of 2-(7-Hydroxy-2-p-tolyl-chromen-4-ylidene)-1-p-tolyl-ethanone (**4e**)

**Figure S22.**  $^{13}\text{C}$  NMR of 2-(7-Hydroxy-2-p-tolyl-chromen-4-ylidene)-1-p-tolyl-ethanone (**4e**)

**Figure S23.** ESI-MS of 2-[7-hydroxy-2-(4-methoxy-phenyl)-chromen-4-ylidene]-1-(4-methoxy-

phenyl)-ethanone (**4f**)

**Figure S24.**  $^1\text{H}$  NMR of 2-[7-hydroxy-2-(4-methoxy-phenyl)-chromen-4-ylidene]-1-(4-methoxy-phenyl)-ethanone (**4f**)

**Figure S25.**  $^{13}\text{C}$  NMR of 2-[7-hydroxy-2-(4-methoxy-phenyl)-chromen-4-ylidene]-1-(4-methoxy-phenyl)-ethanone (**4f**)

**Figure S26.** ESI-MS of 1-(4-Chloro-phenyl)-2-[2-(4-chloro-phenyl)-7-hydroxy-chromen-4-ylidene]-ethanone (**4g**)

**Figure S27.**  $^1\text{H}$  NMR of 1-(4-Chloro-phenyl)-2-[2-(4-chloro-phenyl)-7-hydroxy-chromen-4-ylidene]-ethanone (**4g**)

**Figure S28.**  $^{13}\text{C}$  NMR of 1-(4-Chloro-phenyl)-2-[2-(4-chloro-phenyl)-7-hydroxy-chromen-4-ylidene]-ethanone (**4g**)

**Figure S29.** The structures of compounds **4a-4g**

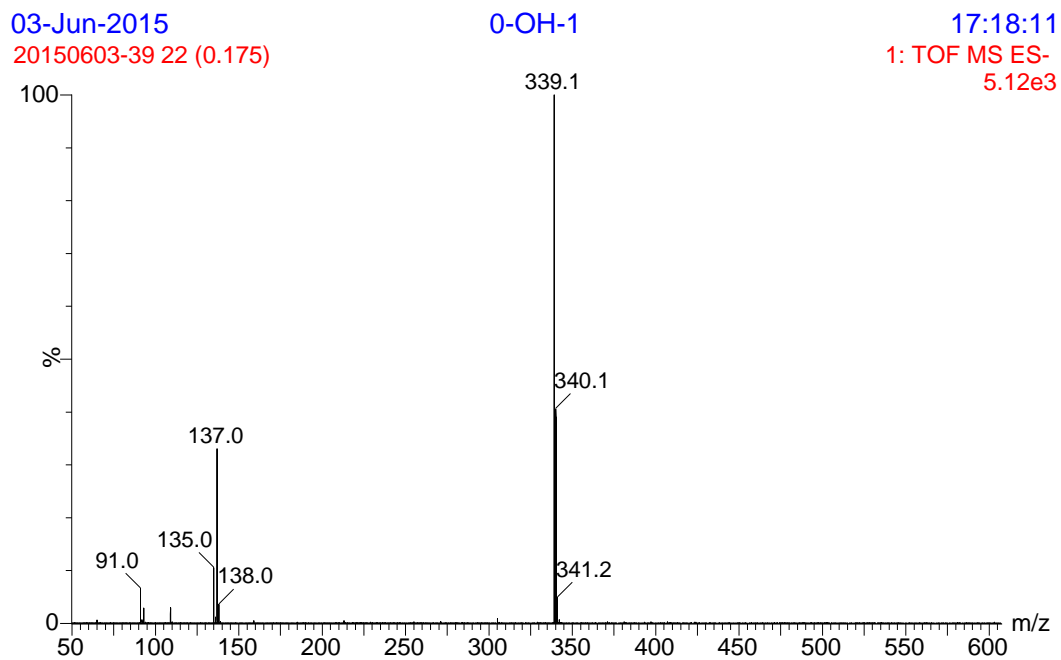

**Figure S1.** ESI-MS of 2-(7-hydroxy-2-phenyl-chromen-4-ylidene)-1-phenyl-ethanone (**4a**)

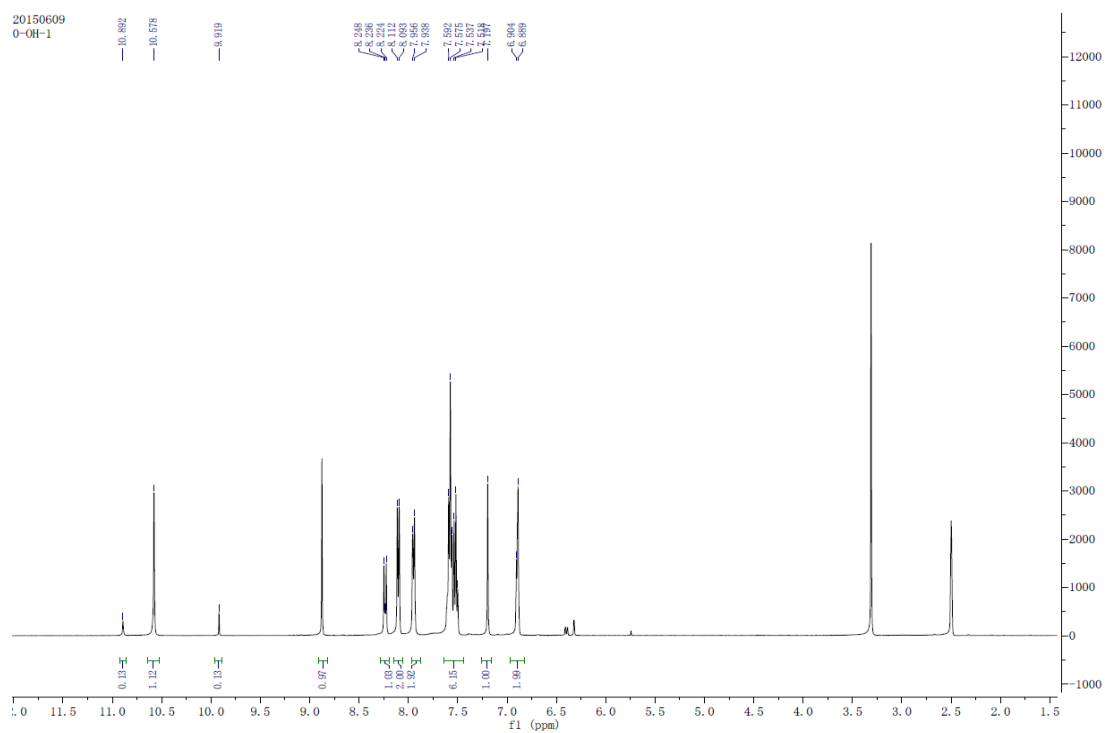

**Figure S2.**  $^1\text{H}$  NMR of 2-(7-hydroxy-2-phenyl-chromen-4-ylidene)-1-phenyl-ethanone (**4a**)

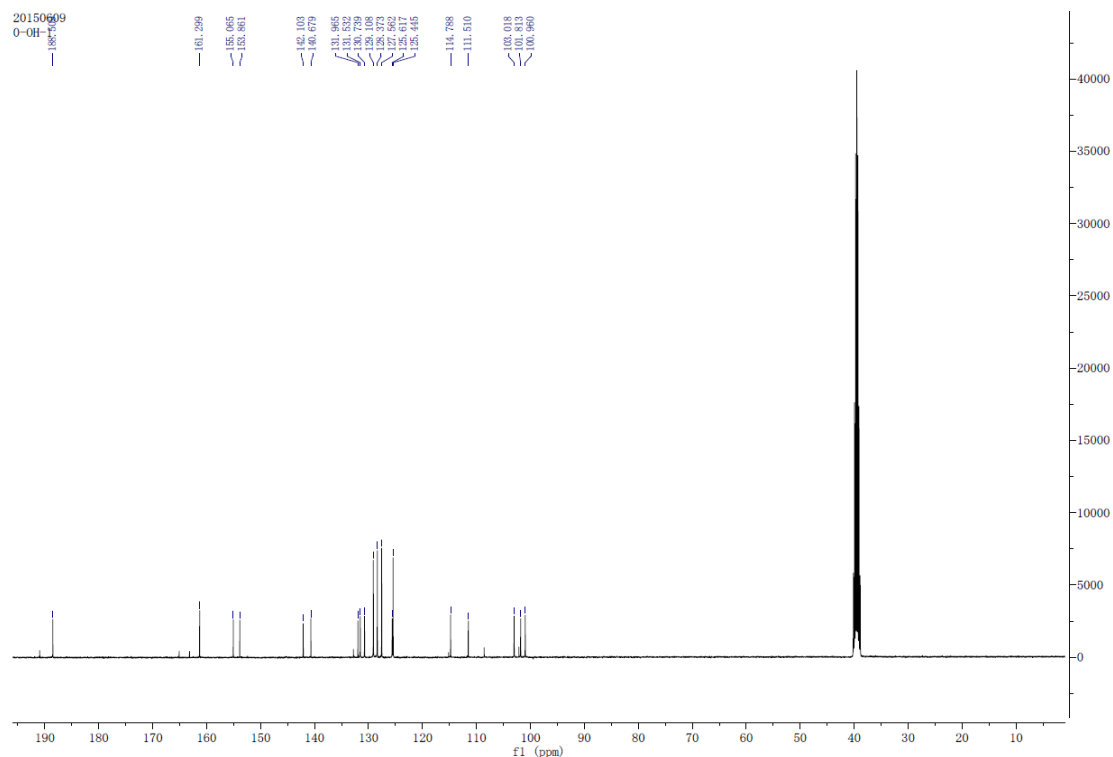

**Figure S3.**  $^{13}\text{C}$  NMR of 2-(7-hydroxy-2-phenyl-chromen-4-ylidene)-1-phenyl-ethanone (**4a**)

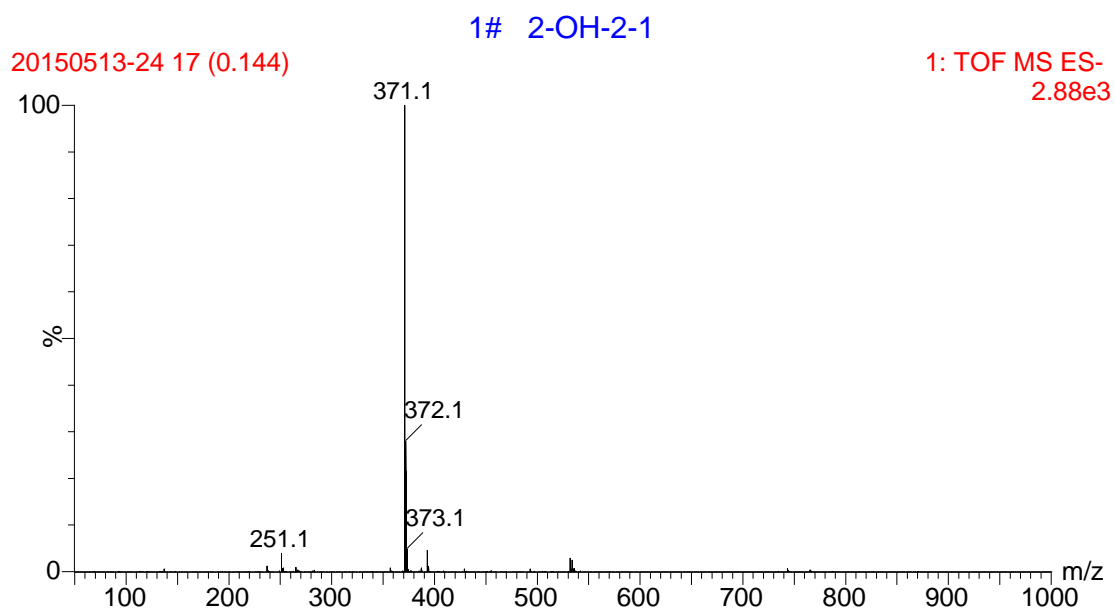

**Figure S4.** ESI-MS of 2-[7-hydroxy-2-(2-hydroxy-phenyl)-chromen-4-ylidene]-1-(2-hydroxy-phenyl)-ethanone (**4b**)



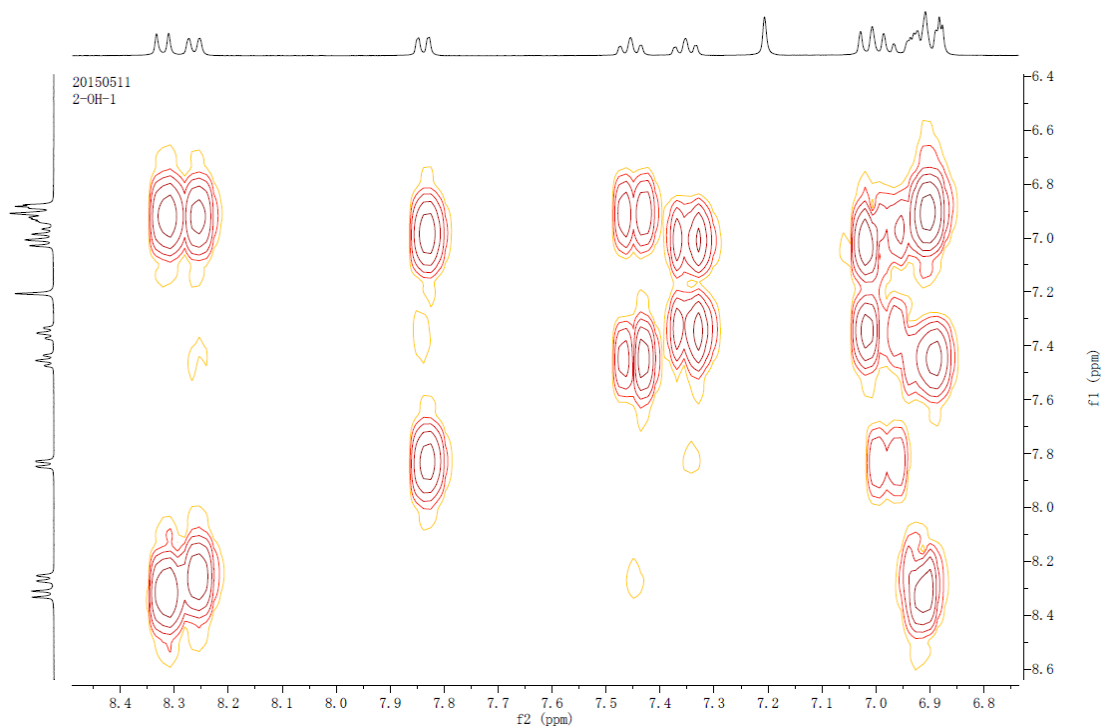

**Figure S6.**  $^1\text{H}$ - $^1\text{H}$  COSY of 2-[7-hydroxy-2-(2-hydroxy-phenyl)-chromen-4-ylidene]-1-(2-hydroxy-phenyl)-ethanone (**4b**)

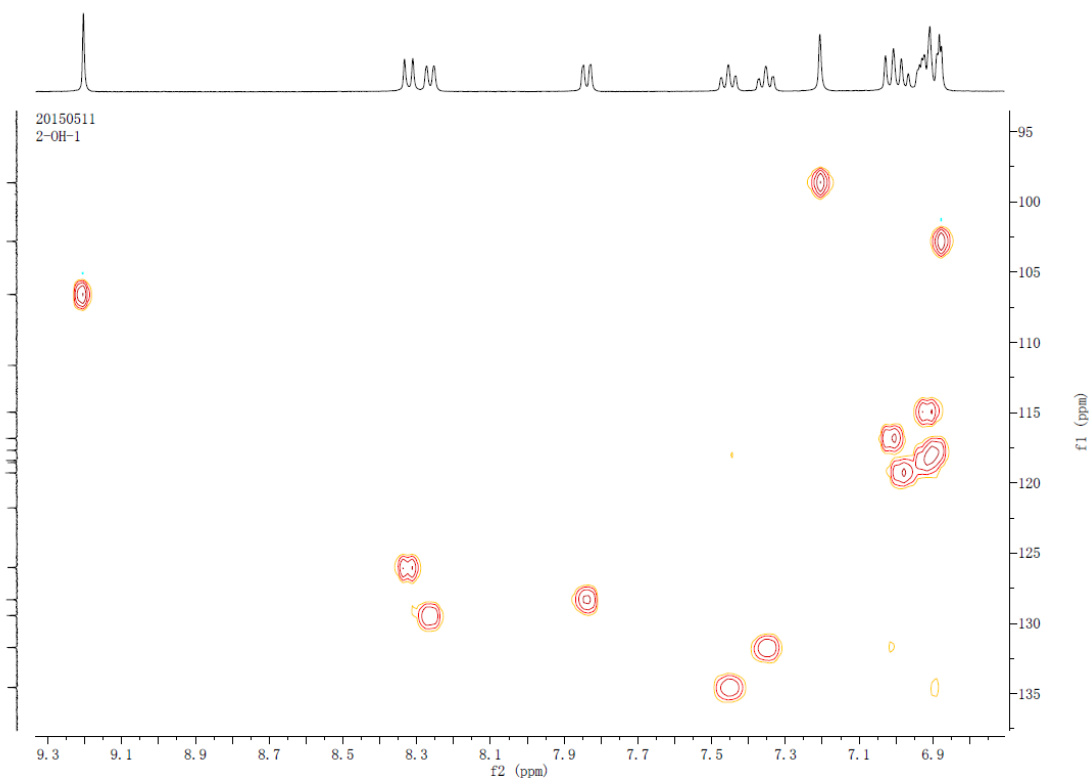

**Figure S7.** HSQC of 2-[7-hydroxy-2-(2-hydroxy-phenyl)-chromen-4-ylidene]-1-(2-hydroxy-phenyl)-ethanone (**4b**)

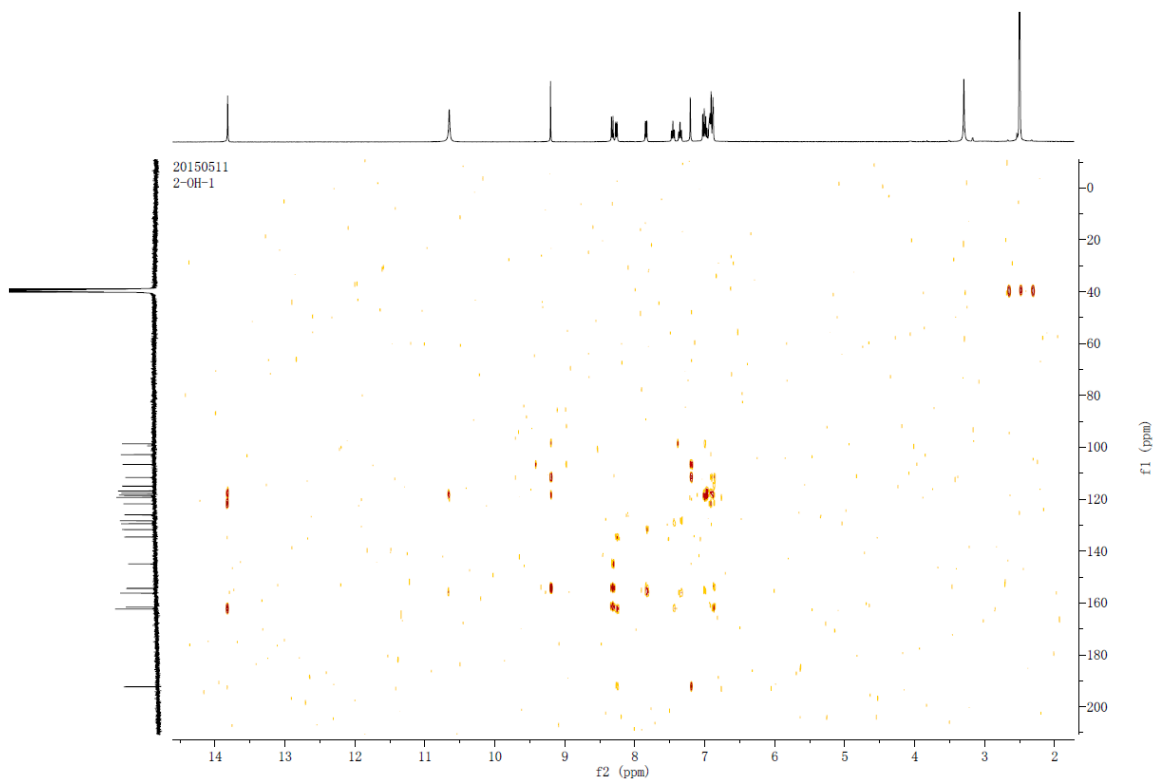

**Figure S8.** HMBC of 2-[7-hydroxy-2-(2-hydroxy-phenyl)-chromen-4-ylidene]-1-(2-hydroxy-phenyl)-ethanone (**4b**)

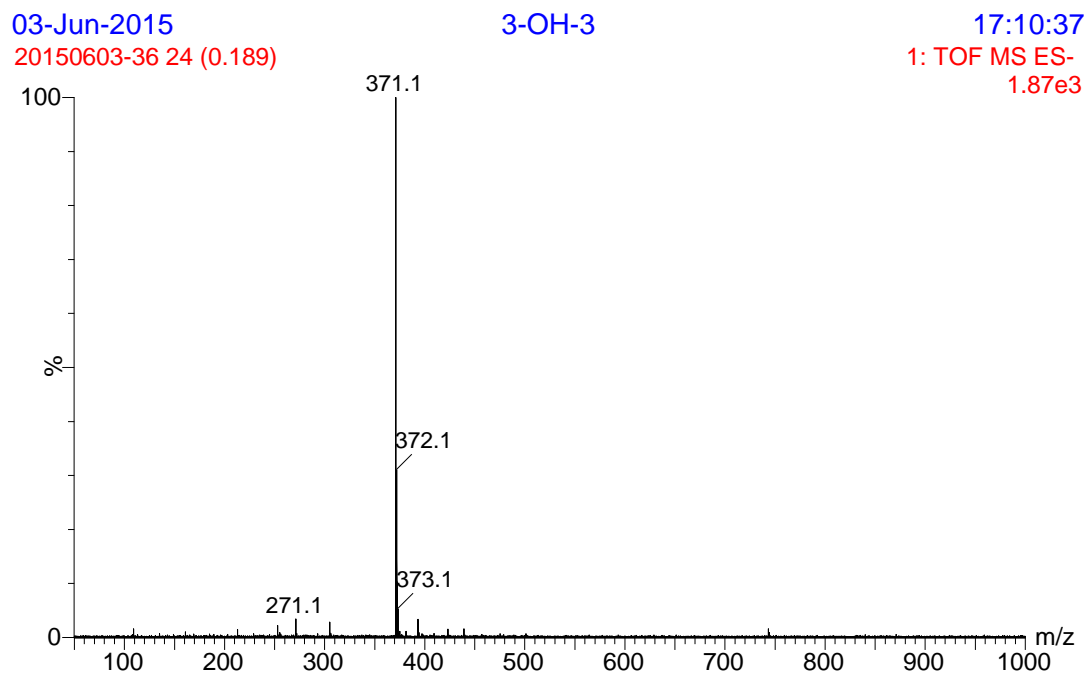

**Figure S9.** ESI-MS of 2-[7-hydroxy-2-(3-hydroxy-phenyl)-chromen-4-ylidene]-1-(3-hydroxy-phenyl)-ethanone (**4c**)





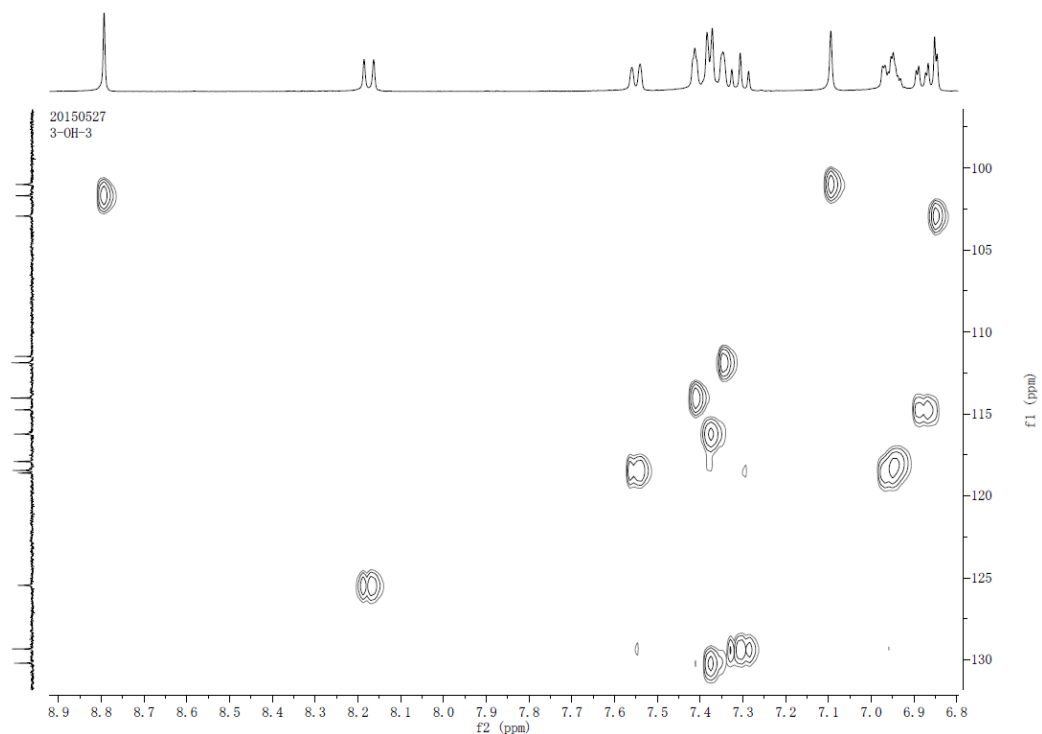

**Figure S12.** HSQC of 2-[7-hydroxy-2-(3-hydroxy-phenyl)-chromen-4-ylidene]-1-(3-hydroxy-phenyl)-ethanone (**4c**)

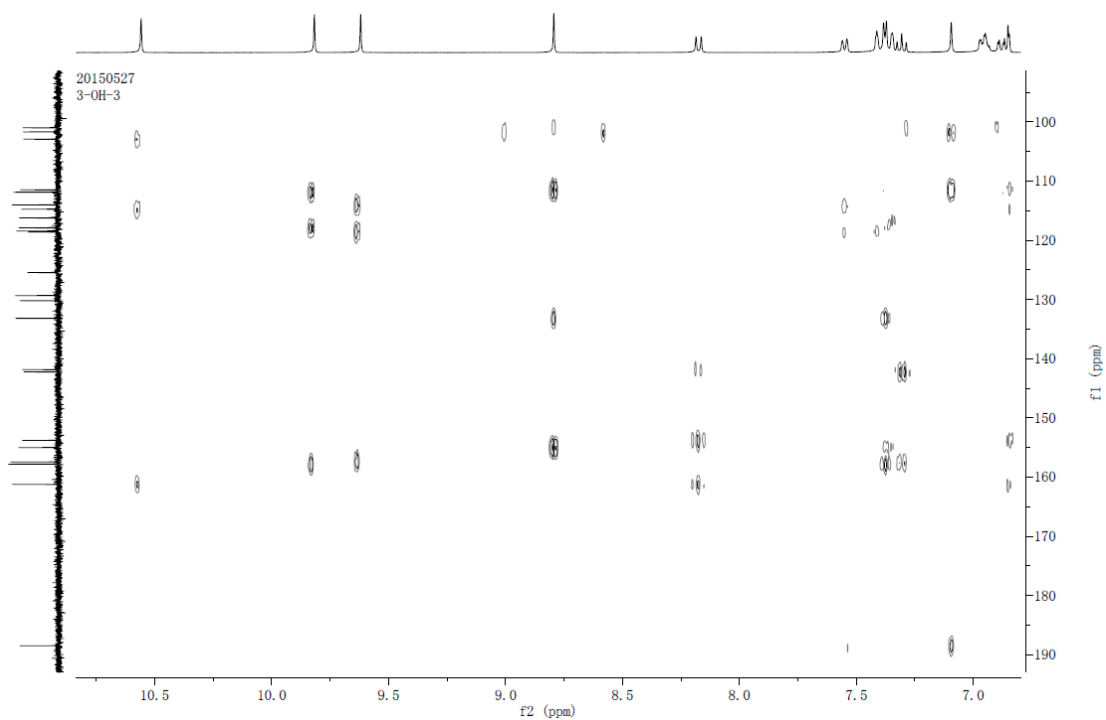

**Figure S13.** HMBC of 2-[7-hydroxy-2-(3-hydroxy-phenyl)-chromen-4-ylidene]-1-(3-hydroxy-phenyl)-ethanone (**4c**)

25-Jun-2015

20150625-17 17 (0.149)

4-OH-1

16:19:50

1: TOF MS ES-  
1.43e3

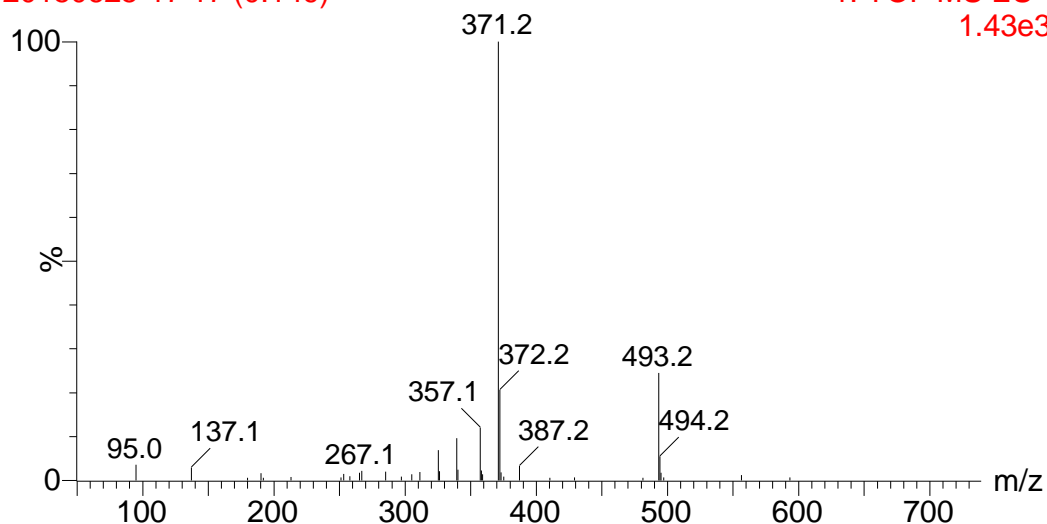

**Figure S14.** ESI-MS of 2-[7-hydroxy-2-(4-hydroxy-phenyl)-chromen-4-ylidene]-1-(4-hydroxy-phenyl)-ethanone (**4d**)

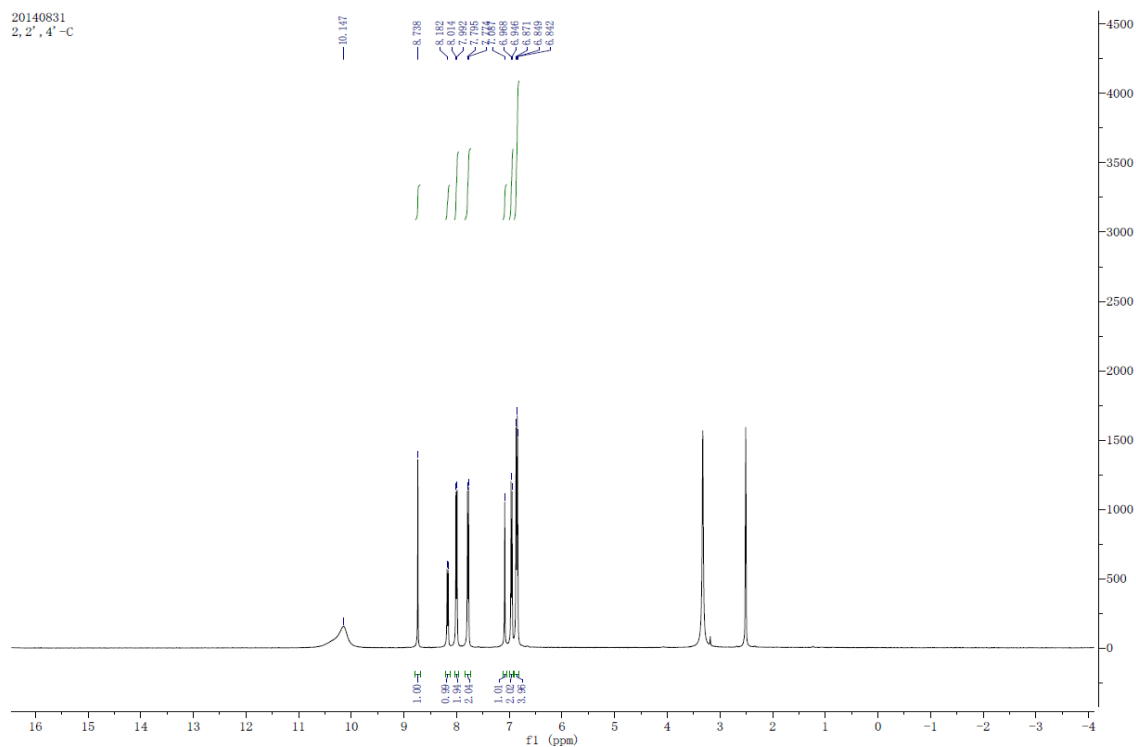

**Figure S15.** <sup>1</sup>H NMR of 2-[7-hydroxy-2-(4-hydroxy-phenyl)-chromen-4-ylidene]-1-(4-hydroxy-phenyl)-ethanone (**4d**)



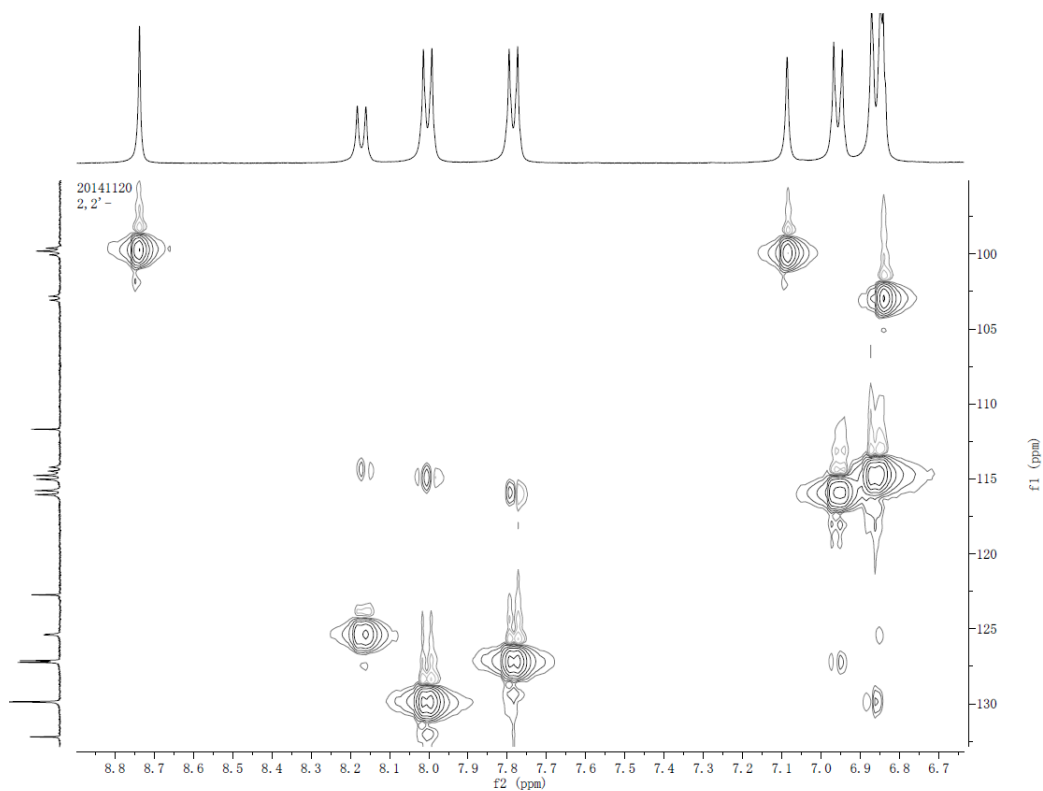

**Figure S18.** HSQC of 2-[7-hydroxy-2-(4-hydroxy-phenyl)-chromen-4-ylidene]-1-(4-hydroxy-phenyl)-ethanone (**4d**)

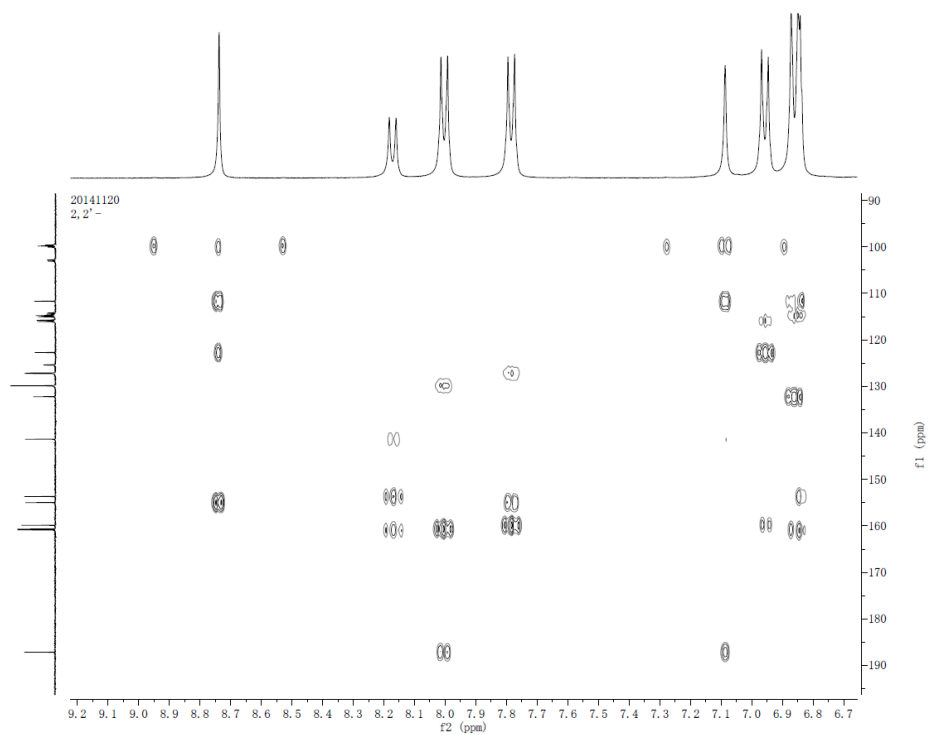

**Figure S19.** HMBC of 2-[7-hydroxy-2-(4-hydroxy-phenyl)-chromen-4-ylidene]-1-(4-hydroxy-phenyl)-ethanone (**4d**)

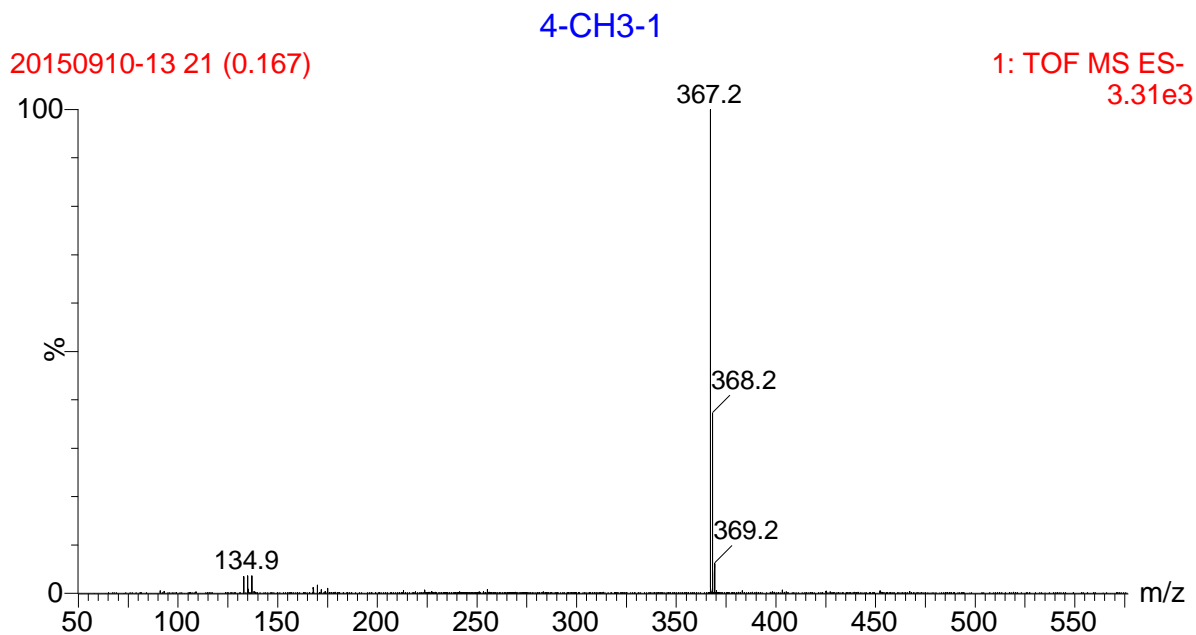

**Figure S20.** ESI-MS of 2-(7-Hydroxy-2-p-tolyl-chromen-4-ylidene)-1-p-tolyl-ethanone (**4e**)

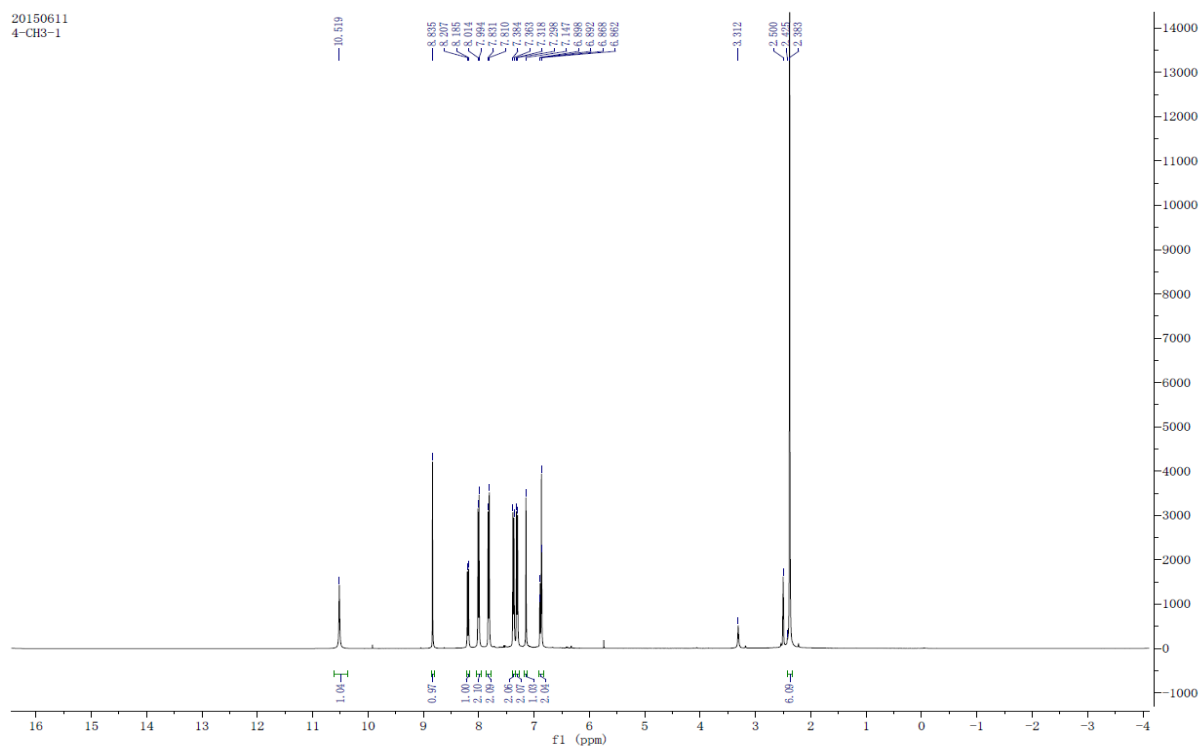

**Figure S21.**  $^1\text{H}$  NMR of 2-(7-Hydroxy-2-p-tolyl-chromen-4-ylidene)-1-p-tolyl-ethanone (**4e**)

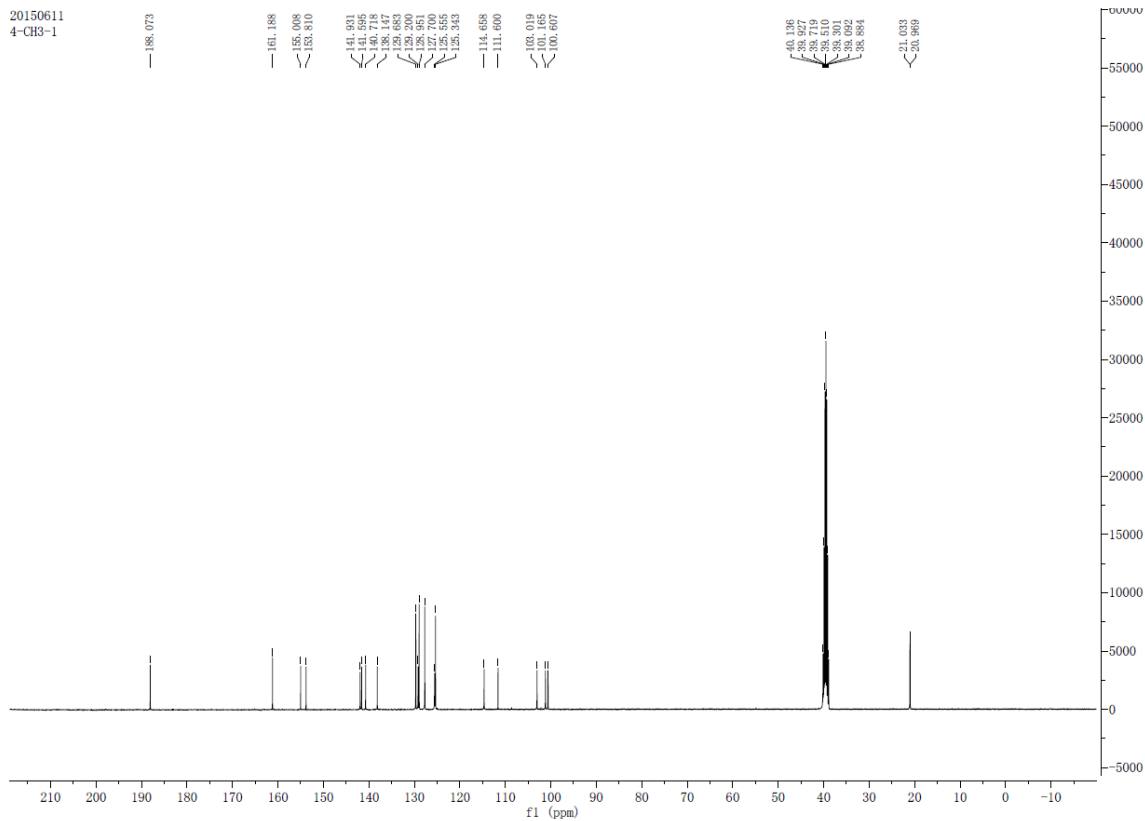

**Figure S22.**  $^{13}\text{C}$  NMR of 2-(7-Hydroxy-2-p-tolyl-chromen-4-ylidene)-1-p-tolyl-ethanone (**4e**)

09-Jun-2015

4-OCH3

10:05:48

20150608-52 8 (0.147)

1: TOF MS ES-  
1.50e3

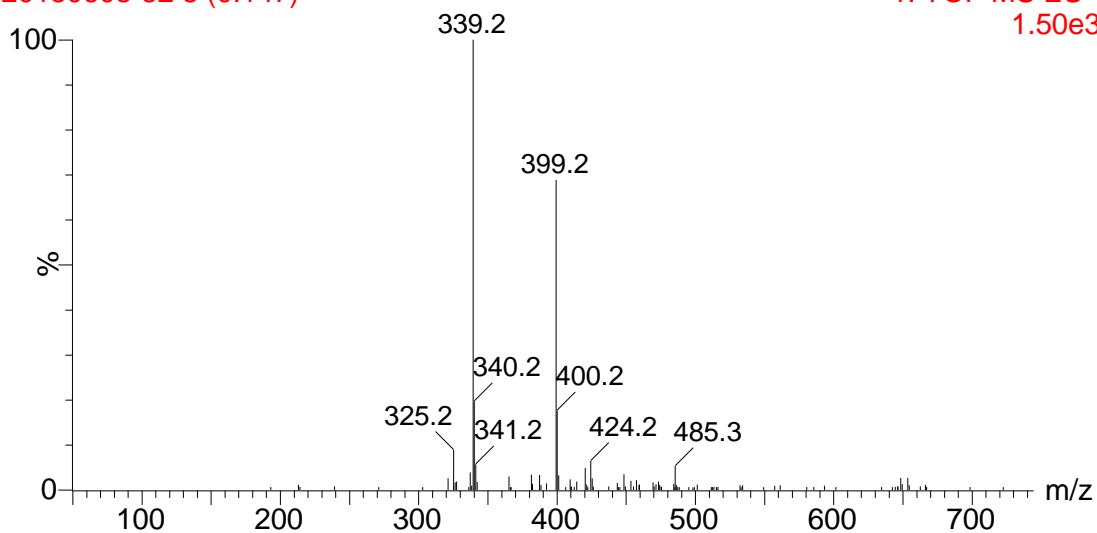

**Figure S23.** ESI-MS of 2-[7-hydroxy-2-(4-methoxy-phenyl)-chromen-4-ylidene]-1-(4-methoxy-phenyl)-ethanone (**4f**)

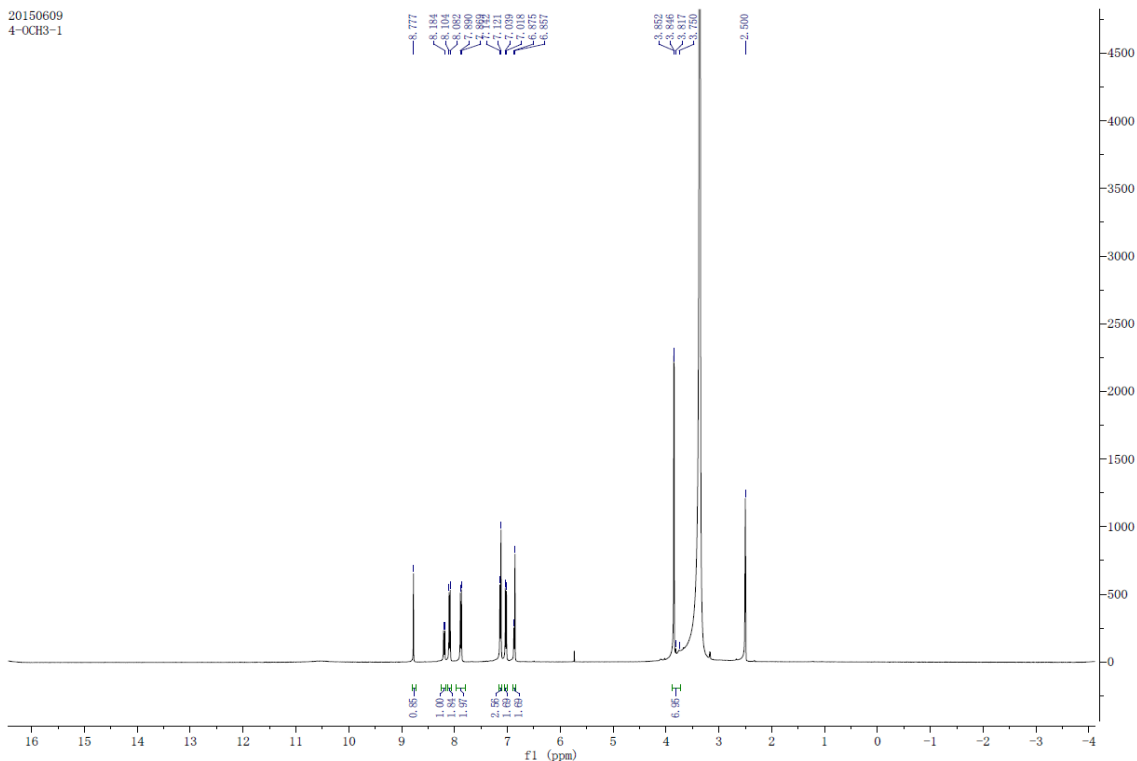

**Figure S24.**  $^1\text{H}$  NMR of 2-[7-hydroxy-2-(4-methoxy-phenyl)-chromen-4-ylidene]-1-(4-methoxy-phenyl)-ethanone (**4f**)

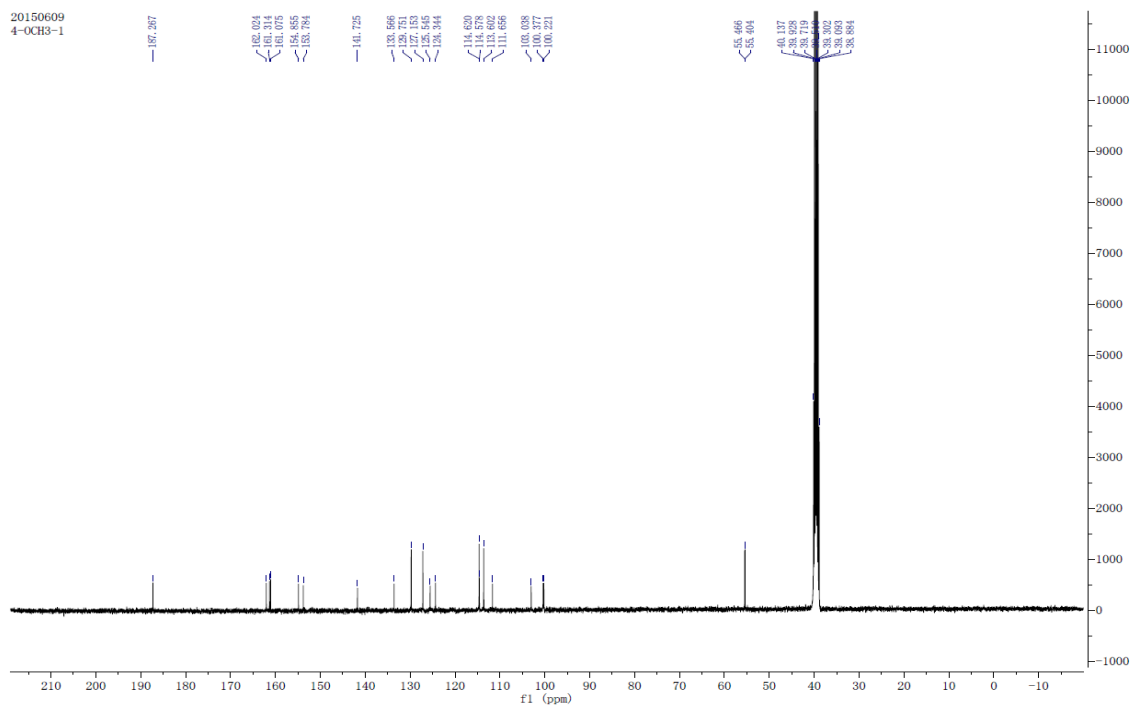

**Figure S25.**  $^{13}\text{C}$  NMR of 2-[7-hydroxy-2-(4-methoxy-phenyl)-chromen-4-ylidene]-1-(4-methoxy-phenyl)-ethanone (**4f**)



25-Jun-2015

4-CL-1

16:09:05

20150625-12 17 (0.149)

1: TOF MS ES-  
2.36e4

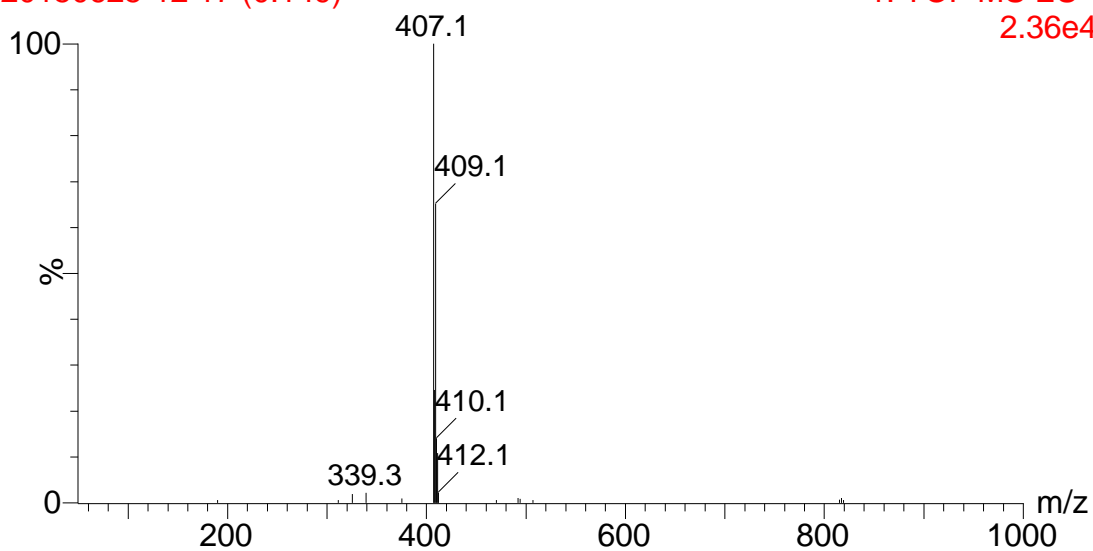

**Figure S26.** ESI-MS of 1-(4-Chloro-phenyl)-2-[2-(4-chloro-phenyl)-7-hydroxy-chromen-4-ylidene]-ethanone (**4g**)

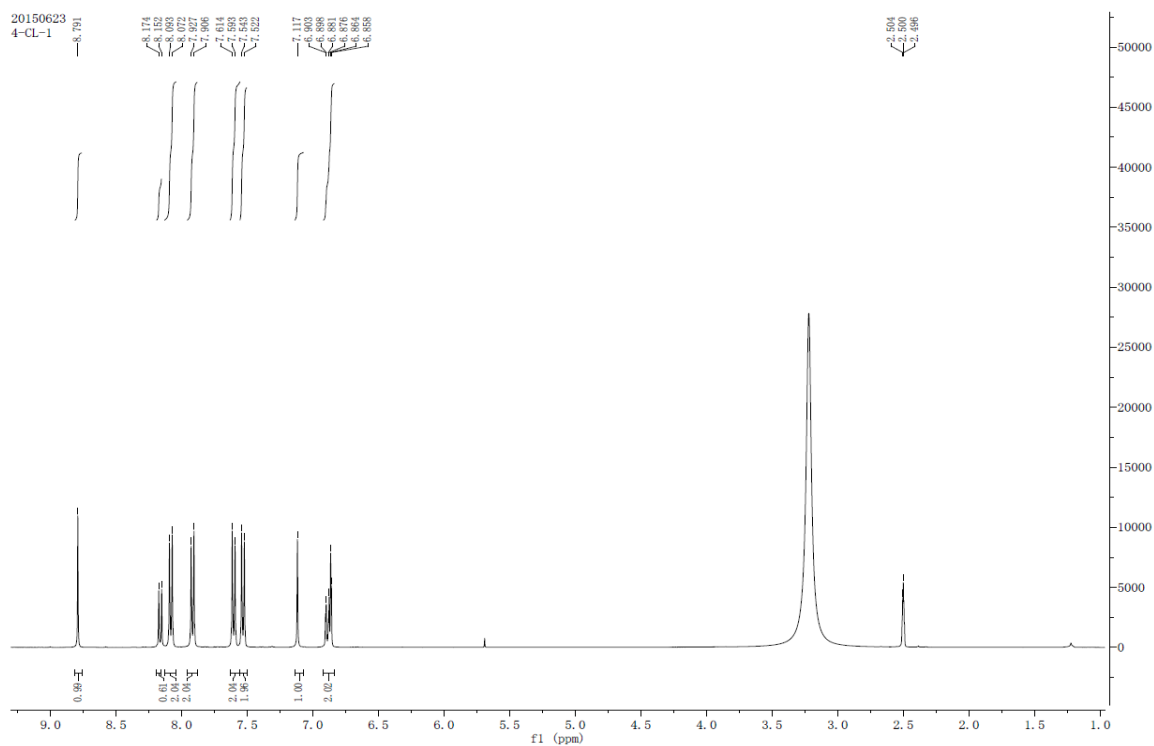

**Figure S27.** <sup>1</sup>H NMR of 1-(4-Chloro-phenyl)-2-[2-(4-chloro-phenyl)-7-hydroxy-chromen-4-ylidene]-ethanone (**4g**)

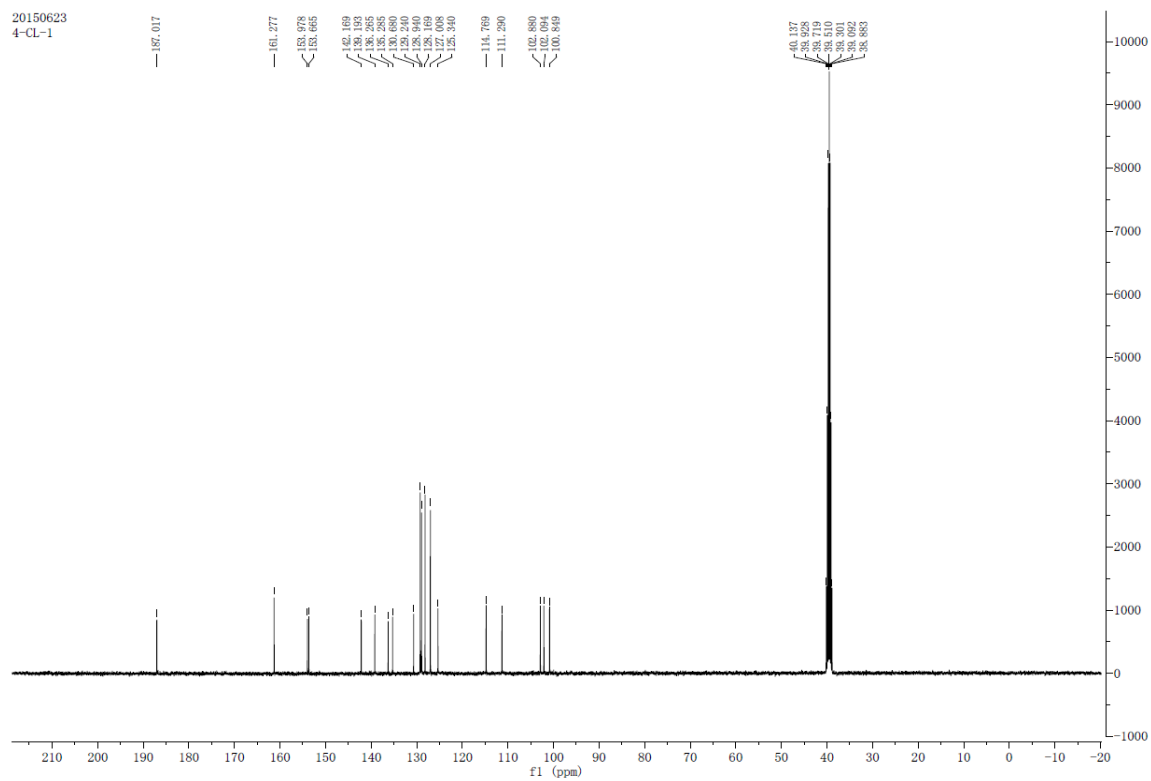

**Figure S28.**  $^{13}\text{C}$  NMR of 1-(4-Chloro-phenyl)-2-[2-(4-chloro-phenyl)-7-hydroxy-chromen-4-ylidene]-ethanone (**4g**)

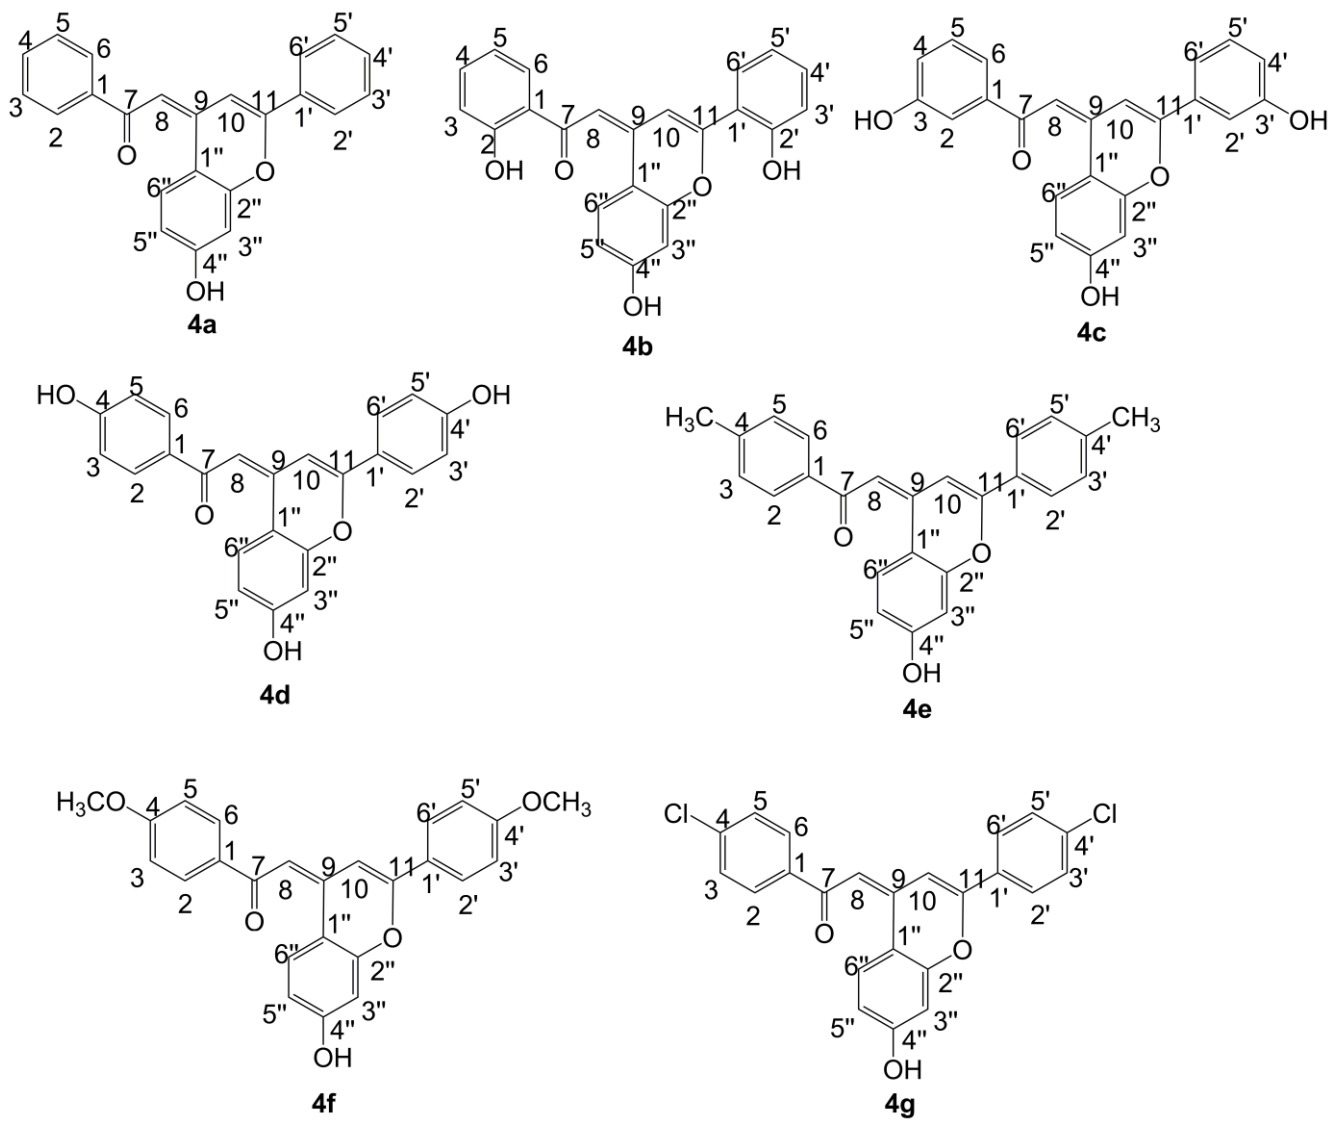

**Figure S29.** The structures of compounds **4a-4g**
